# Supplementary material for: The relative importance of photodegradation and biodegradation of terrestrially derived dissolved organic carbon across four lakes of differing trophic status
Source: Copernicus journal article supplement (doi:10.5194/bg-17-6327-2020), 2020-12-15
Supplement: Supplementary file 1 [file bg-17-6327-2020-supplement.pdf]

Supplement of Biogeosciences, 17, 6327–6340, 2020  
<https://doi.org/10.5194/bg-17-6327-2020-supplement>  
© Author(s) 2020. This work is distributed under  
the Creative Commons Attribution 4.0 License.

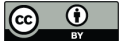

*Supplement of*

## **The relative importance of photodegradation and biodegradation of terrestrially derived dissolved organic carbon across four lakes of differing trophic status**

**Christopher M. Dempsey et al.**

*Correspondence to:* Christopher M. Dempsey ([dempsey007@gannon.edu](mailto:dempsey007@gannon.edu))

The copyright of individual parts of the supplement might differ from the CC BY 4.0 License.

## Supplemental Information

**Table 1.** Timeframe for when samples were deployed on the surface of Lake Lacawac, the total amount of light received by samples (280–700 nm), and the average surface (0.1 m) temperature of Lake Lacawac during each 7 day experiment

| Month  | Dates       | Total Light ( $\text{J km}^{-2} \text{nm}^{-1}$ ) | Mean Surface Temp ( $^{\circ}\text{C}$ ) $\pm$ SD |
|--------|-------------|---------------------------------------------------|---------------------------------------------------|
| May    | May 9-16    | 299.9                                             | 15.1 $\pm$ 1.5                                    |
| June   | June 7-13   | 365.4                                             | 20.1 $\pm$ 1.4                                    |
| July   | July 7-13   | 320.9                                             | 25.4 $\pm$ 0.8                                    |
| August | August 8-14 | 365.4                                             | 26.2 $\pm$ 1.1                                    |

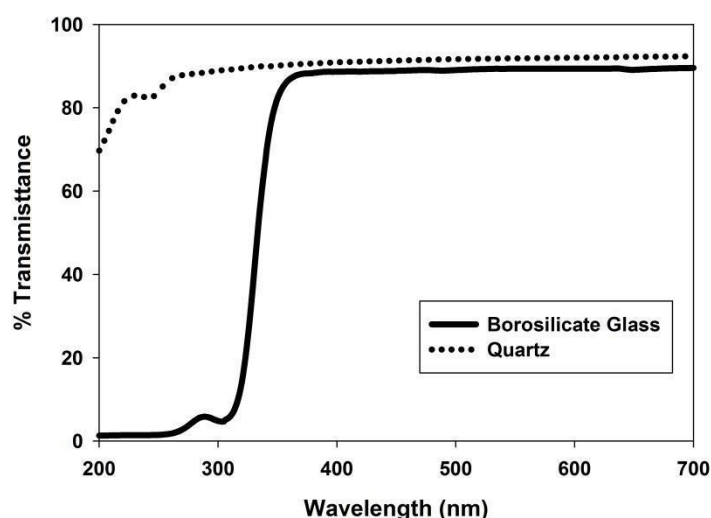

**Figure 1.** Percent transmittance of the quartz and borosilicate glass that was used for the experiments.

### Supplemental Methods

The photodegradation treatments described above (DOC, DIC, DO,  $S_r$ , and  $SUVA_{320}$ ) were normalized to the total amount of light received by the samples for each month. This allowed us to determine the impact of seasonality. To calculate the total amount of light ( $\text{J m}^{-2} \text{nm}^{-1}$ ), a modeled solar spectrum (280-700nm) was created. The base spectrum was generated with the Quick TUV Calculator (version 5.2; [http://cprm.acom.ucar.edu/Models/TUV/Interactive\\_TUV/](http://cprm.acom.ucar.edu/Models/TUV/Interactive_TUV/)) for June 21 through June 27, 2016 (Madronich 1993). The latitude and longitude of Lake Lacawac (Table 1) was provided and the ozone concentration from the Total Ozone Mapping

18 Spectrometer (TOMS; <https://ozoneaq.gsfc.nasa.gov/tools/ozonemap/>) for each day was entered.  
19 We then fit this modeled solar spectrum to our GUV data for each experimental timeframe using  
20 Solver in Microsoft Excel (version 2013). A best fit was determined by calculating the square of  
21 the difference between the measured GUV data and the values estimated by the model for the  
22 305 and 340nm wavelengths. In the resulting modeled solar spectra (SI Fig. 2), the total amount  
23 of light (280-700nm) was summed for each month of the experiment and was used to standardize  
24 the concentration and optical data described above.

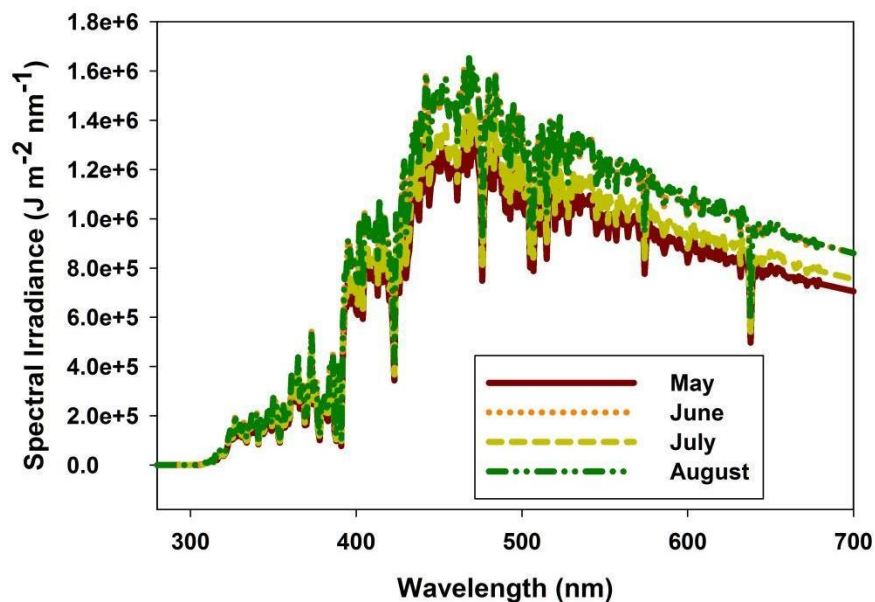

25 **Figure 2.** Modeled solar spectra for each month plotted against wavelength (nm)  
26  
27

28  
29

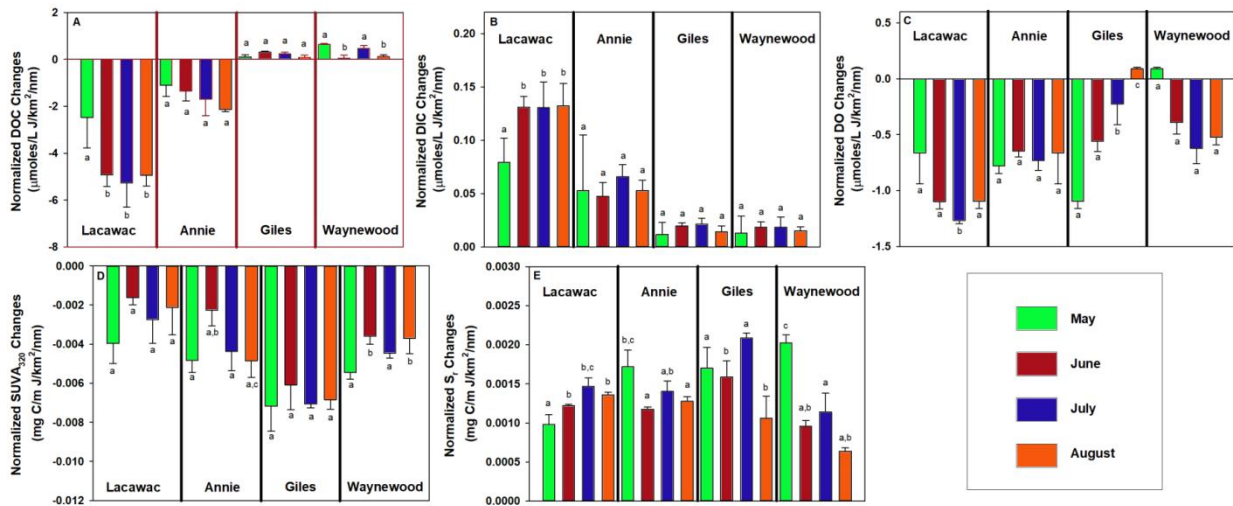

30  
 31 **Figure 3.** Normalized photodegradation data (described in SI Fig 2) for each variable, lake, and  
 32 month. Photodegradation samples were compared to controls (0 value on each panel). The panels  
 33 are arranged as follows: A) DOC, B) DIC, C) DO, D) SUVA<sub>320</sub>, and E) Sr. Statistical  
 34 significance is indicated by the letter(s) above each bar. Months were compared using an  
 35 ANOVA with a Tukey post-hoc test (CI = 95%). n = 3 for each bar.

36  
 37  
 38  
 39  
 40  
 41  
 42  
 43  
 44  
 45  
 46  
 47  
 48  
 49  
 50  
 51  
 52  
 53  
 54  
 55  
 56  
 57  
 58  
 59  
 60  
 61  
 62

## References

63  
64  
65  
66  
67

Madronich, S. UV radiation in the natural and perturbed atmosphere. Pages 17–69 in M. Tevini, editor. Environmental effects of UV (ultraviolet) radiation. Lewis Publisher, Boca Raton, Florida, 1993.
